1 The limits to parapatric speciation 3: Evolution of strong  
2 reproductive isolation in presence of gene flow despite limited  
3 ecological differentiation

4 Alexandre Blanckaert <sup>\*1,2</sup>, Claudia Bank<sup>2</sup>, and Joachim Hermisson<sup>1,3</sup>

5 <sup>1</sup>Department of Mathematics, University of Vienna, 1090 Vienna, Austria

6 <sup>2</sup>Instituto Gulbenkian de Ciência, 2780-156 Oeiras, Portugal

7 <sup>3</sup>Mathematics and Biosciences Group, Max F. Perutz Laboratories, 1030 Vienna, Austria

8 February 19, 2020

9 The limits to parapatric speciation III: Evolution of strong reproductive  
10 isolation in the presence of gene flow despite limited ecological  
11 differentiation

12 Short title:

13 Strong reproductive isolation in 3 steps

14 **Abstract**

15 Gene flow tends to impede the accumulation of genetic divergence. Here, we determine  
16 the limits for the evolution of postzygotic reproductive isolation in a model of two populations  
17 that are connected by gene flow. We consider two selective mechanisms for the creation and  
18 maintenance of a genetic barrier: local adaptation leads to divergence among incipient species  
19 due to selection against migrants, and Dobzhansky-Muller incompatibilities (DMIs) reinforce  
20 the genetic barrier through selection against hybrids. In particular, we are interested in the  
21 maximum strength of the barrier under a limited amount of local adaptation, a challenge  
22 that may initially face many incipient species. We first confirm that with classical two-locus  
23 DMIs, the maximum amount of local adaptation is indeed a limit to the strength of a genetic

---

\*blanckaert.a@gmail.com

24 barrier. However, with three or more loci and cryptic epistasis, this limit holds no longer. In  
25 particular, we identify a minimal configuration of three epistatically interacting mutations  
26 that is sufficient to confer strong reproductive isolation.

## Introduction

28 Understanding the mechanisms that drive speciation remains a challenge of evolutionary  
29 research [1, 2, 3, 4]. Recently, parapatric speciation - where incipient species are spatially  
30 separated, but still exchange migrants - has received considerable attention, both in empirical  
31 and theoretical research [5, 3, 6, 7]. In particular, several studies have analysed the potential for  
32 the evolution of a postzygotic isolation barrier in the presence of gene flow [5, 8, 9]. Whereas  
33 such barriers can easily arise in strict allopatry, even small amounts of gene flow can impede their  
34 buildup. This is due to two main problems. First, persistent gene flow acts to swamp divergent  
35 alleles between populations [5]. Second, gene flow creates a permanent fitness cost for any  
36 genetic incompatibility that contributes to a genetic barrier due to production of unfit hybrids  
37 [9]. Local adaptation can be a potent mechanism to protect divergent alleles from swamping.  
38 Indeed, there are indications that at least some local adaptation is necessary for parapatric  
39 speciation [10, 5]. Consequently, some authors [11] have suggested mechanisms purely based  
40 on divergent selection to explain how speciation can happen in parapatry. They assumed that  
41 each new mutation contributes to local adaptation. Barrier genes are additive without epistasis  
42 between single mutations. This corresponds to a scenario of pure ecological speciation. With  
43 such unlimited potential for ecological differentiation, evolution can easily build a genetic barrier  
44 to gene flow. However, this is not necessarily a realistic mechanism in natural populations.  
45 Whereas immigrants from a genetically closely related sister population may often have fitness  
46 deficits, they are rarely “dead on arrival”. Especially early during divergence, environments  
47 need to be similar enough for the ancestral population to survive in both habitats. This limits  
48 the selection differential generated by local adaptation. For example, Via [12] showed in pea  
49 aphids that residents have a fitness that is 3.3 to 20 times larger than the fitness of migrants.  
50 Furthermore, genetic barriers that are based uniquely on ecological differences can only be  
51 temporary, since they are maintained only as long as their causal environment persists. The  
52 dissociation between local adaptation and the strength of a genetic barrier to gene flow is thus  
53 key for the evolution of strong reproductive isolation and for completing the speciation process.

54

55 In this manuscript, we address when and how strong reproductive isolation can evolve be-  
56 tween two parapatric populations with limited ecological differentiation. To this end, we first  
57 define measures that characterize the strength of a genetic barrier and compare this with the  
58 amount of ecological differentiation that is available between the two populations. We then focus

59 on the role of epistasis and the pattern of incompatibilities among genes building the genetic  
 60 barrier. Our results show that, for a broad range of conditions, the potential for ecological differ-  
 61 entiation is indeed an upper limit for the strength genetic barrier that can be formed. However,  
 62 we also show that this constraint can be broken and that particular patterns of strong epistasis  
 63 enable the evolution of strong reproductive isolation in parapatry. A barrier of this type must  
 64 involve at least three interacting loci: two interacting barrier loci and one locus that changes  
 65 their genetic background. A strong genetic barrier can thus evolve parapatrically in (minimally)  
 66 three steps from an undifferentiated initial state.

## Model

### 68 General definition

69 We consider a migration-selection model in a continent-island framework [5, 9]. The model  
 70 consists of two panmictic populations, one on an island and the other on a continent, each of  
 71 sufficient size that we can ignore genetic drift. We consider the population genetic dynamics of  
 72 the island population, which receives unidirectional migration from the continental population  
 73 at (backward) rate  $m$  per individual and generation. In the main part of this article, we consider  
 74 a three-locus model, with diallelic loci  $A$ ,  $B$  and  $C$ . Ancestral alleles are denoted by lowercase  
 75 letters and derived alleles by uppercase letters. Allele  $A$  (resp.  $B$  and  $C$ ) has a selection  
 76 coefficient  $\alpha$  (resp.  $\beta$  and  $\gamma$ ) compared to the ancestral allele  $a$  (resp.  $b$  and  $c$ ). We derive  
 77 extended results for models with more than three loci in the Supplementary Information (SI).  
 78 Below and in the SI, for multiple loci  $A_i$  and  $B_j$ , we use the following notation: allele  $A_i$  has a  
 79 selective advantage  $\alpha_i$  over allele  $a_i$  and its epistatic interaction with allele  $B_j$  is given by  $\epsilon_{A_i B_j}$ .

80 Epistasis can occur between any combination of derived alleles and is denoted by  $\epsilon$ , with  
 81 the involved alleles indicated as subscript. For example,  $\epsilon_{ABC}$  denotes 3-way epistasis between  
 82 alleles  $A$ ,  $B$  and  $C$ . The fitness of each haplotype is given in Table 1.

| Hap.  | abc   | Abc      | aBc     | abC      | ABc               | AbC               | aBC               | ABC                                                                |
|-------|-------|----------|---------|----------|-------------------|-------------------|-------------------|--------------------------------------------------------------------|
| $x_i$ | $x_1$ | $x_2$    | $x_3$   | $x_4$    | $x_5$             | $x_6$             | $x_7$             | $x_8$                                                              |
| $w_i$ | 0     | $\alpha$ | $\beta$ | $\gamma$ | $\alpha + \beta$  | $\alpha + \gamma$ | $\beta + \gamma$  | $\alpha + \beta + \gamma$                                          |
|       |       |          |         |          | $+ \epsilon_{AB}$ | $+ \epsilon_{AC}$ | $+ \epsilon_{BC}$ | $+ \epsilon_{AB} + \epsilon_{AC} + \epsilon_{BC} + \epsilon_{ABC}$ |

Table 1: Notation of frequencies  $x_i$  and fitness values  $w_i$  of the eight different haplotypes for haploid populations in the 3-locus model.

83 We assume that the continent is always monomorphic. When evolution happens on the con-  
84 tinent, each substitution is assumed to be instantaneous. That is because we are only interested  
85 in the (potential) polymorphic equilibrium state on the island, where individuals from both  
86 populations meet and mix. The haplotype frequency dynamics of an arbitrary haplotype  $X$  on  
87 the island (e.g.,  $X = abC$ ) under the continuous-time weak-selection approximation is:

$$\dot{x} = (w_X - \bar{w} - m)x + f_R(x) + m_C, \quad (1)$$

88 where the migration rate  $m_C = m$ , if  $X$  is the continental haplotype and  $m_C = 0$  otherwise.  
89 Here,  $f_R(X)$  describes the change in frequency of haplotype  $X$  due to recombination. The  
90 detailed ordinary differential equation system with an explicit expression of the complicated  
91 function  $f_R(X)$  is given in the SI (eq. S1). Our analytical results focus on two special cases  
92 that have been shown to capture most of the important behaviour [5, 9]: tight linkage (defined  
93 as the limit  $r \rightarrow 0$  for all recombination rates,  $f_R(x) = 0$ ) and loose linkage (defined as the limit  
94  $r \rightarrow \infty$ ; dynamics are given in eq. S4). The second scenario corresponds to the assumption of  
95 linkage equilibrium between all loci, which approximately holds true when the recombination  
96 rates are much larger than the selection coefficients and migration rates [5, 9] (confirmed in the  
97 Results section Fig. 3). We complement our analytical approach with numerical simulations for  
98 intermediate recombination rates.

99 We study both haploid and diploid populations. For diploid populations, we assume that all  
100 direct effects of derived alleles are codominant [5, 9, 13]. Regarding epistasis, we consider two  
101 scenarios: codominance and recessivity of the epistatic interaction. The two scenarios differ in  
102 the expression of epistasis in double and triple heterozygotes (cf. [5]).

103 With the continuous time approach employed here, all selection and migration parameters  
104 are rates. For the study of equilibria, only relative rates matter and we can thus scale all  
105 parameters by the selective advantage of the  $A$  allele on the island,  $\alpha$  (note that we always  
106 assume  $\alpha \neq 0$ ).

## 107 **Measures of the genetic barrier to gene flow and the maximum amount of** 108 **local adaptation**

109 Our aim here is to assess scenarios in which a strong barrier to gene flow can evolve despite  
110 limited potential for (extrinsically driven) local adaptation. To this end, we need to define  
111 measures for both the barrier strength and the amount of local adaptation.

112 Following Bank et al. (2012) [5] and Blanckaert & Hermisson (2018) [9], we define the  
113 barrier strength as the maximum migration rate  $m_{\max}$  that can be sustained while maintaining  
114 the polymorphism at the barrier loci. Note that  $m_{\max}$ , defined this way, is specific to a set of  
115 barrier loci in a specific genetic background. We reflect this in our notation by adding labels to  
116  $m_{\max}$  to indicate the island alleles that are maintained polymorphic. For example, consider a  
117 2-locus barrier with derived alleles  $A$  and  $B$  at the barrier loci, with allele  $A$  appearing on the  
118 island and  $B$  on the continent. To maintain both loci polymorphic, alleles  $A$  and  $b$  must persist  
119 on the island in migration-selection balance, because  $aB$  is the immigrating haplotype from the  
120 continent.  $m_{\max}^{Ab}$  is the maximum migration rate for the maintenance of this stable equilibrium;  
121 above this value either  $A$  or  $b$  (or both) are lost. The barrier strength can also depend on the  
122 genetic background. We will include reference to this background in our notation whenever  
123 necessary by writing  $m_{\max}^{Ab|c}$  or  $m_{\max}^{Ab|C}$  for the strength of the  $(Ab)$  barrier in the background of  
124 the ancestral  $c$  or derived  $C$  allele, respectively, where either of these alleles at locus  $C$  is fixed on  
125 both the continent and the island. While others measures exist (e.g., introgression probability  
126 of a linked neutral allele [14]), we focus on this measure, which assesses the maintenance of  
127 divergence at the barrier itself.

128 To measure local adaptation, we define two parameters that capture either the current state  
129 or the overall fitness landscape of the system. The first one,  $\Lambda$ , depends on a subset of model  
130 parameters and the time of observation, the second,  $\Lambda_{\max}$ , depends on the whole set of model  
131 parameters.

132 For any state of the population, we measure the *current amount of local adaptation* on  
133 the island  $\Lambda$  as the fitness advantage of the fittest segregating genotype on the island over a  
134 continental migrant. Recall that the continent is always monomorphic in our model. (With a  
135 polymorphic continent, the genotype with the largest fitness on the continent would provide the  
136 reference). This measure is consistent with the verbal notion of local adaptation by Kawecki &  
137 Ebert (2004) [15] and illustrated in Figure 1. Using the 2-locus barrier example mentioned above,  
138 the current amount of local adaptation, after the first mutational step, is given by  $\Lambda_{ab}^{Ab} = \alpha$  if  $A$   
139 appeared first and  $\Lambda_{aB}^{ab} = -\beta$  if  $B$  appeared first. After the second mutational step, the current  
140 amount of local adaptation is given by  $\Lambda_{aB}^{Ab} = \alpha - \beta$ .

141 In addition, we define the *maximum amount of local adaptation* that can occur in the model  
142 over the course of the differentiation process that results in a given genetic barrier as  $\Lambda_{\max}$ . Note  
143 that  $\Lambda_{\max}$  does not depend on the current state, but is a property of the full fitness landscape.  
144 It captures all states that could have occurred (i.e., that are allowed by the fitness landscape)

145 during the adaptive process from a given ancestral state. We thus need to consider all possible  
146 evolutionary histories to determine  $\Lambda_{\max}$ . Using the 2-locus barrier example mentioned above,  
147 the maximum amount of local adaptation,  $\Lambda_{\max}^{Ab}$  is given by:  $\Lambda_{\max}^{Ab} = \max(\Lambda_{ab}^{Ab}, \Lambda_{aB}^{ab}, \Lambda_{aB}^{Ab})$ . To  
148 match the genetic barrier notation, we will use  $\Lambda_{\max}^{Ab|C}$  if we need to mention that the genetic  
149 barrier depends on the genetic background (here a fixed allele  $C$ ).

150 From this definition we see, in particular, that the maximum amount of local adaptation for  
151 a large barrier which includes many loci is always larger or equal than the value of  $\Lambda_{\max}$  for any  
152 smaller barrier that involves only a subset of these loci. For diploids, we consider the fitness  
153 differences between genotypes scaled by the ploidy of the individual. Using this definition allows  
154 us to maintain a consistent notation for haploid and diploid populations: for a single locus  $A$ , we  
155 always have  $m_{\max}^A = \Lambda_{\max}^A$ . We include a limit to local adaptation into our model by assuming  
156 that  $\Lambda_{\max}$  is bounded by the ecology of the system. However, the fitness difference between the  
157 optimal island genotype and a hybrid (or any maladapted genotype) may be much larger, since  
158 these genotypes are not part of any evolutionary trajectories.

## Results

### 160 Maximum amount of local adaptation as a limit to barrier strength

161 If the external environment sets a limit to the amount of local adaptation, does this also  
162 imply a limit on the strength of the genetic barrier that can evolve in the presence of gene  
163 flow? We address this question by asking whether the former restricts the latter, i.e. whether  
164 the maximum amount of local adaptation during the differentiation process  $\Lambda_{\max}$  limits the  
165 barrier strength  $m_{\max}$ . For simplicity, we will refer to genetic barriers as strong if  $m_{\max} > \Lambda_{\max}$   
166 and as weak otherwise. Indeed, we find that for many types of fitness landscapes and linkage  
167 architectures, genetic barriers can only be weak in this sense.

168 For a single-locus barrier in a haploid population, it is straightforward to see that  $m_{\max} =$   
169  $\Lambda_{\max}$  since local adaptation (direct selection against migrants) is the only mechanism that can  
170 maintain a polymorphism. This result holds independently of whether a locally adaptive allele  
171 appears on the island or whether a maladaptive allele immigrates from the continent. This result  
172 readily generalizes to the case of  $n$  biallelic loci in tight linkage, which acts like a single-locus  
173 model with  $2^n$  alleles. Only two haplotypes can be maintained at equilibrium [16]: the best  
174 one on the island (verifying eq. (S11)) and the immigrating one, regardless of epistasis. This  
175 result extends to diploid individuals as long as there is no under- or overdominance. If gene flow

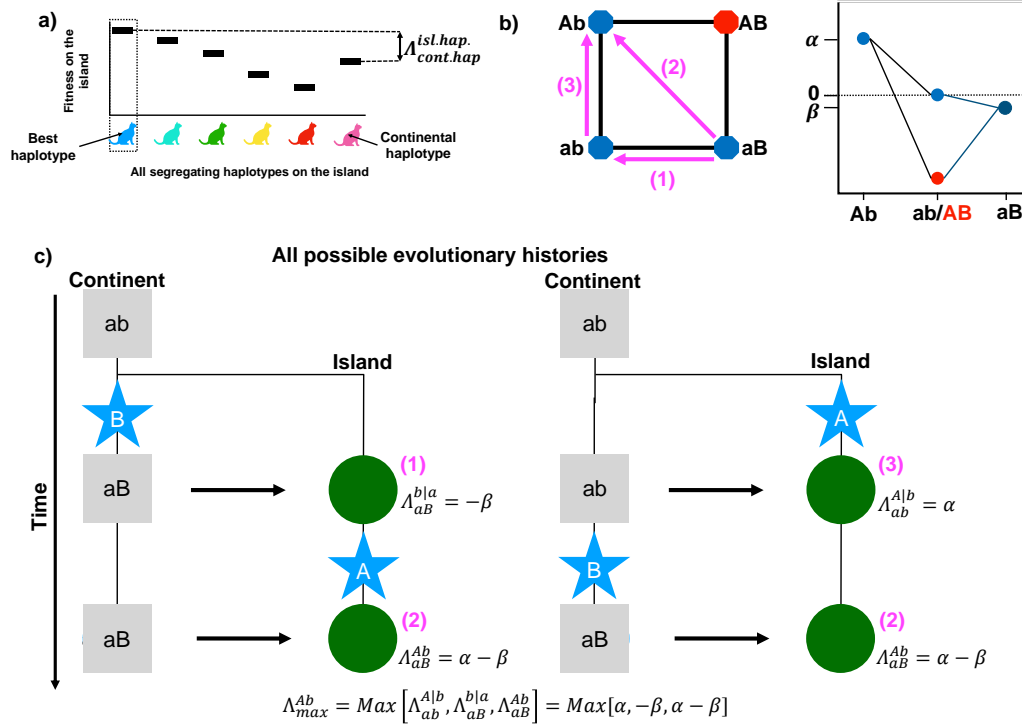

Figure 1: **Measures of local adaptation.** We define two measures of environmental heterogeneity between the continent and the island, the “current amount of local adaptation” and the “maximum amount of local adaptation”. a) The schematic shows an example in which six haplotypes are segregating on the island. The current amount of local adaptation of the population,  $\Lambda_{\text{cont.hap}}^{\text{isl.hap}}$  corresponds to the difference in fitness, evaluated on the island, between the fittest segregating possible haplotype on the island (in blue) and the fittest possible haplotype on the continent (in pink). b) Fitness graph and fitness landscapes for a two-locus model with a DMI. The arrow corresponds to the fitness comparison between the continental haplotype (base of the arrow) and island haplotype (tip of the arrow), with the number corresponding to the evolutionary step in panel c). The fitness landscape shows a case in which  $\beta < 0$ , meaning that  $B$  is a local adaptation to the continent. In our general model,  $\beta$  can take both positive and negative values, which means that  $B$  can also be beneficial both on the island and the continent. c) Potential evolutionary histories leading to the formation of a genetic barrier in a 2-locus model. For each possible evolutionary step, we compute the current amount of local adaptation of the island population as  $\Lambda_{\text{cont.hap}}^{\text{polymorphic island alleles} | \text{fixed alleles}}$ . The magenta numbers correspond to the same comparison made on the fitness graph from b). The maximum amount of local adaptation,  $\Lambda_{\text{max}}^{Ab}$ , generated by the fitness graph given in panel, is the maximum of these values. If we use the fitness landscape depicted in panel b), we obtain  $\Lambda_{\text{max}}^{Ab} = \alpha - \beta$ .



176 exceeds the temporary amount of local adaptation,  $m > \Lambda$ , the continental haplotype replaces  
 177 the island haplotype. Since  $\Lambda \leq \Lambda_{\max}$ , the maximum amount of local adaptation  $\Lambda_{\max}$  is always  
 178 an upper bound for the strength of the genetic barrier,  $m_{\max} \leq \Lambda_{\max}$ . For weak, but non-zero  
 179 recombination  $r$ , this result remains valid as long as  $r$  is small relative to the selection coefficients  
 180 and migration rates (Fig. S7).

181 In the absence of epistasis and for multiple loosely linked loci, the temporary amount of  
 182 local adaptation  $\Lambda$  is simply the sum of the selection coefficients  $\alpha_i > 0$  of segregating island  
 183 alleles relative to the immigrating continental alleles at the same locus (where island alleles  
 184 can be ancestral or derived). During the differentiation process, this value is maximized in the  
 185 final state when all mutations that contribute to the barrier under consideration have appeared,  
 186  $\Lambda_{\max}^{A_1 \dots A_n} = \sum_{i=1}^n \alpha_i$ . In contrast, the strength of the genetic barrier maintaining all loci  $A_i$   
 187 polymorphic is given by the smallest selection coefficient:  $m_{\max}^{A_1 \dots A_n} = \min_{1 \leq i \leq n} (\alpha_i)$ . For given  $\Lambda_{\max}$ ,  
 188 this barrier is therefore maximized when all loci share the same selection strength:  $\alpha_i = \frac{\Lambda_{\max}^{(A_1 \dots A_n)}}{n}$ .  
 189 Clearly, we have  $m_{\max} < \Lambda_{\max}$  for more than a single locus, i.e., the maximum amount of local  
 190 adaptation  $\Lambda_{\max}$  is again an upper bound for the strength of the genetic barrier. This result  
 191 ( $m_{\max} < \Lambda_{\max}$ ) readily extends to intermediate recombination rates as recombination ends up  
 192 breaking the best haplotype (once formed) without any additional benefits.

193 Having shown that it is impossible to form a strong genetic barrier in the absence of epistasis  
 194 or if all loci are in tight linkage, we now turn to the case with loose linkage and epistasis. This  
 195 introduces the possibility of selection against recombinant hybrids. Since fitness differences  
 196 between the optimal types and maladaptive hybrids can be much larger than the strength of  
 197 local adaptation  $\Lambda_{\max}$ , selection is not constrained by the ecology and can potentially result in  
 198 a strong barrier. For two loci and negative epistasis (i.e., a DMI), the barrier strength under a  
 199 combination of local adaptation and selection against hybrids has previously been analyzed by  
 200 Bank et al. [5]. The authors focused on the case of an allele  $A$  appearing on the island and  $B$   
 201 appearing on the continent, with negative epistasis between the two derived alleles. From their  
 202 result for  $m_{\max}^{Ab}$  (eq. 11 of [5]), we can deduce that the maximum strength for the corresponding  
 203 genetic barrier (eq. (2))

$$\left\{ \begin{array}{lll} \text{if } \beta \leq -\alpha & \max(m_{\max}^{Ab}) = \alpha & < \alpha - \beta = \Lambda_{\max}^{Ab} \\ \text{if } -\alpha \leq \beta \leq 0 & \max(m_{\max}^{Ab}) = \frac{(\alpha - \beta)^2}{4\alpha} & < \alpha - \beta = \Lambda_{\max}^{Ab} \\ \text{if } \beta \geq 0 & \max(m_{\max}^{Ab}) = \frac{\alpha}{4} & < \alpha = \Lambda_{\max}^{Ab}. \end{array} \right. \quad (2)$$

204 From equation (2) it is clear that the maximum amount of local adaptation is again an upper  
205 bound for the strength of the genetic barrier.

206 We extended this model to allow for positive epistasis and derived the expression for  $m_{\max}$   
207 (given in eq. (S5)). With positive epistasis, a genetic barrier can exist only if allele  $B$  is deleteri-  
208 ous on the island, and the maximum of this barrier is given by  $\max(m_{\max}^{Ab}) = -\beta$ . We therefore  
209 always obtain  $m_{\max} \leq \Lambda_{\max} = \alpha - \beta$ . However, in contrast to the negative epistasis case, it is  
210 possible for a genetic barrier to reach  $m_{\max}^{Ab} = \Lambda_{\max}^{Ab}$ , when  $A$  is neutral ( $\alpha = 0$ ) on the island, and  
211  $B$  is extremely deleterious ( $\beta = -\Lambda_{\max}^{Ab}$ ) on the island when associated with allele  $a$  but neutral  
212 when associated with allele  $A$ . This corresponds to a scenario in which allele  $A$  compensates the  
213 deleterious effect of allele  $B$ . Here, immigration of  $B$  boosts the marginal fitness of allele  $A$  and  
214 therefore counteracts the swamping effect of immigration of  $a$ . This result also holds if the roles  
215 of  $A$  and  $B$  are reversed and if both alleles  $A$  and  $B$  appear on the island or on the continent.

216 For two biallelic loci, there is only a single epistasis parameter. In particular, interactions  
217 among derived alleles must be either negative or positive. This severely limits the complexity  
218 of the fitness landscape. We identify further, more complex, classes of epistasis patterns, where  
219 the maximum amount of local adaptation is an upper bound for the strength of the genetic  
220 barrier, as illustrated below for three loci and with general results presented in the SI. These  
221 patterns include 1) any barrier that includes either an island allele that is not involved in  
222 positive interactions, or a continental allele that is not involved in negative interactions (see  
223 sections S 2.3 and S 2.4); 2) any barrier where all derived alleles originate on the island or all on  
224 the continent (see sections S 2.5 and S 2.6); 3) any barrier with only positive or only negative  
225 epistatic interactions between derived alleles (this directly follows from points 1 and 2) (section  
226 S 2.7); 4) any barrier where derived alleles on the continent and the island do not interact, or  
227 interact only through negative epistasis (see section S 2.8).

228 This suggests that only more complex epistasis, with a combination of positive and negative  
229 interactions, can result in a strong genetic barrier. We thus consider a diallelic 3-locus model  
230 in the rest of the manuscript, which is fully parametrized with three direct selection coefficients  
231 and four epistatic parameters, allowing for complex interactions.

## 232 **Three-locus model and the role of cryptic epistasis in the formation of strong** 233 **genetic barriers**

234 **Haploid populations** We first consider a case of with two pairwise epistatic interactions.  
235 First, we focus on a case with two island adaptations  $A$  and  $C$ , which appear on the island, and

236 a continental adaptation  $B$ . The different possible cases illustrate the general rules above for  
 237 the impossibility of a strong barrier.

238 • Negative pairwise epistasis between  $A$  and  $B$  and  $B$  and  $C$  cannot result in a strong  
 239 barrier. Indeed, in the absence of allele  $B$ , we have  $m_{\max}^{AC|b} = \min(\alpha, \gamma)$ , which is smaller  
 240 than  $\Lambda_{\max}^{AC|b} = \alpha + \gamma$ . Once allele  $B$  is introduced on the continent, the marginal fitness of  
 241 alleles  $A$  and  $C$  decreases, leading to  $m_{\max}^{AbC} < m_{\max}^{AC|b}$ . Since the two-locus barrier with  $A$   
 242 and  $C$  is a subset of the three-locus barrier,  $\Lambda_{\max}^{AC|b} \leq \Lambda_{\max}^{AbC}$ , and therefore  $m_{\max}^{AbC} < \Lambda_{\max}^{AbC}$ .  
 243 The corresponding fitness graph for this case is given in Fig. 2 panel a).

244 • Similarly, pairwise positive interaction between  $A$  and  $B$ , and  $B$  and  $C$  is not sufficient  
 245 for a strong barrier. The genetic barrier formed by allele  $A$  and  $C$ , assuming  $B$  is fixed on  
 246 the island, corresponds to a case described above (i.e. two non-interacting loci), therefore  
 247  $m_{\max}^{AC|B} = \min(\alpha + \epsilon_{AB}, \gamma + \epsilon_{BC})$ , while  $\Lambda_{\max}^{AC|B} = \max(\alpha + \epsilon_{AB}, \gamma + \epsilon_{BC}, \alpha + \epsilon_{AB} + \gamma + \epsilon_{BC}) \leq$   
 248  $\Lambda_{\max}^{AbC}$ . If locus  $B$  is polymorphic on the island, then the marginal fitness of both allele  $A$   
 249 and allele  $C$  is reduced, leading to  $m_{\max}^{AbC} \leq m_{\max}^{AC|B}$  and therefore,  $m_{\max}^{AbC} \leq \Lambda_{\max}^{AbC}$ .

250 • We now consider that one pairwise epistatic interaction is positive and the other negative:  
 251 we assume that alleles  $A$  and  $B$  interact negatively and alleles  $B$  and  $C$  interact positively.  
 252 In the absence of allele  $C$ , this corresponds to the two-locus case mentioned above and  
 253 therefore  $m_{\max}^{Ab|c} \leq \Lambda_{\max}^{Ab|c}$ . If allele  $C$  appears on the island, it directly increases the marginal  
 254 fitness of allele  $B$  on the island, facilitating its fixation on the island. In addition, through  
 255 this effect on  $B$  (leading to a higher equilibrium frequency for  $B$ ), it also indirectly and  
 256 negatively affects the marginal fitness of allele  $A$  facilitating its loss. As a consequence  
 257 of its effect on the marginal fitness on alleles  $A$  and  $B$ , we obtain  $m_{\max}^{AbC} \leq m_{\max}^{Ab|c}$  and  
 258  $\Lambda_{\max}^{Ab|c} < \Lambda_{\max}^{AbC}$ , since the “ $Ab|c$ ” barrier is a subcase of the “ $AbC$ ” barrier, leading to  
 259  $m_{\max}^{AbC} \leq \Lambda_{\max}^{AbC}$ .

260 • Finally, we consider that  $A$  and  $B$  interact negatively and  $A$  and  $C$  positively. In the  
 261 absence of allele  $B$ , the genetic barrier obtained in loose linkage is smaller than its equiv-  
 262 alent in tight linkage since recombination breaks the association between  $A$  and  $C$ . Or in  
 263 tight linkage, the genetic barrier is equal to  $\Lambda_{\max}^{AC|b}$ . Therefore, in the loose linkage case,  
 264  $m_{\max}^{AC|b} < \Lambda_{\max}^{AC|b}$ . Once the  $B$  mutation is introduced, the marginal fitness of allele  $A$  and  
 265  $C$  decreases due to the direct (for  $A$ ) and indirect (for  $C$ ) interaction with allele  $B$ . We  
 266 therefore obtain  $m_{\max}^{AbC} < m_{\max}^{AC|b}$ ; a strong genetic barrier is therefore impossible.

267 Similar arguments show that any barrier must be weak for two derived barrier alleles on the  
268 continent and one on the island (see section S 1.3). The fitness landscapes of all scenarios  
269 described so far share a crucial property (Fig. 2a) and S4): the continental haplotype and the  
270 fittest island haplotype are connected by a fitness ridge (e.g.  $AbC$  and  $aBc$  in Fig. 2a)), and  
271 all genotypes on this fitness ridge can be reconstructed from the (fittest) island and continental  
272 haplotypes by recombination (recombination of  $AbC$  and  $aBc$  in Fig. 2a)).

273 We now consider a case in which a genetic barrier with two barrier loci is combined with a  
274 change in the genetic background (through a derived allele at a third locus that fixed on both  
275 the continent and the island). We assume (as above) that there is an incompatibility between  
276 an adaptation on the island at locus  $A$  and a continental adaptation at locus  $B$  (i.e.  $\alpha > 0$ ,  
277  $\epsilon_{AB} < 0$  and  $\beta < -\epsilon_{AB}$ ). In addition, we assume that a mutation can occur at a third locus (the  
278  $C$  locus). We assume that the derived allele  $C$  is deleterious in the ancestral genetic background  
279 ( $\gamma < 0$ ), but beneficial in the presence of either the  $A$  or the  $B$  allele ( $\epsilon_{AC} > 0$ ,  $\epsilon_{BC} > 0$  and  
280  $\epsilon_{ABC} \leq 0$ ; below we assume  $\epsilon_{AC} = \epsilon_{BC} = -\epsilon_{ABC}$ ). If  $C$  originates on the continent, it can  
281 fix on both the continent and the island (eq. (S21)-(S28); see Fig. 2c) for the three potential  
282 evolutionary histories). We then obtain a 2-locus barrier (loci  $A$  and  $B$ ), but the derived alleles  
283 at this barrier interact with a fixed derived allele in its genetic background. We refer to this  
284 type of interaction as “cryptic epistasis” since it will not be detected in a study that focuses on  
285 divergent alleles between both populations. Notably, the corresponding fitness graph, illustrated  
286 in Fig. 2c) (last row), is characterized by the existence of two haplotypes ( $AbC$  and  $aBC$ ) whose  
287 recombinants ( $abC$  and  $ABC$ ) have very low fitness. Fixation of  $C$  thus deepens the observed  
288 fitness valley between  $Ab$  and  $aB$ .

289 To simplify the notation, we define  $\gamma'$  as the effect of the mutation  $C$  in the background  
290 of at least one other derived allele:  $\gamma' = \gamma + \epsilon_{AC}$ . Notably, this system is equivalent to a  $C$   
291 mutation that appears on the continent, which is advantageous on the island while generating  
292 strong negative epistasis with the ancestral background  $ab$ ,  $\epsilon_{abC} = -\epsilon_{AC}$ . For the rest of the  
293 manuscript, we will use the alternative notation ( $\epsilon_{abC}$  and  $\gamma'$ ) as it is more convenient.

294 For a haploid population and loose linkage, the dynamics simplify to the classical 2-locus  
295 model [5] and are therefore identical to the diploid model (up to some reparametrization, eq.  
296 (S14)). The expression for the maximum amount of local adaptation, generated in this model,  
297 is

$$\Lambda_{\max}^{Ab|C} = \max(\alpha, \alpha - \beta, \alpha - \beta - \gamma', -\gamma'). \quad (3)$$

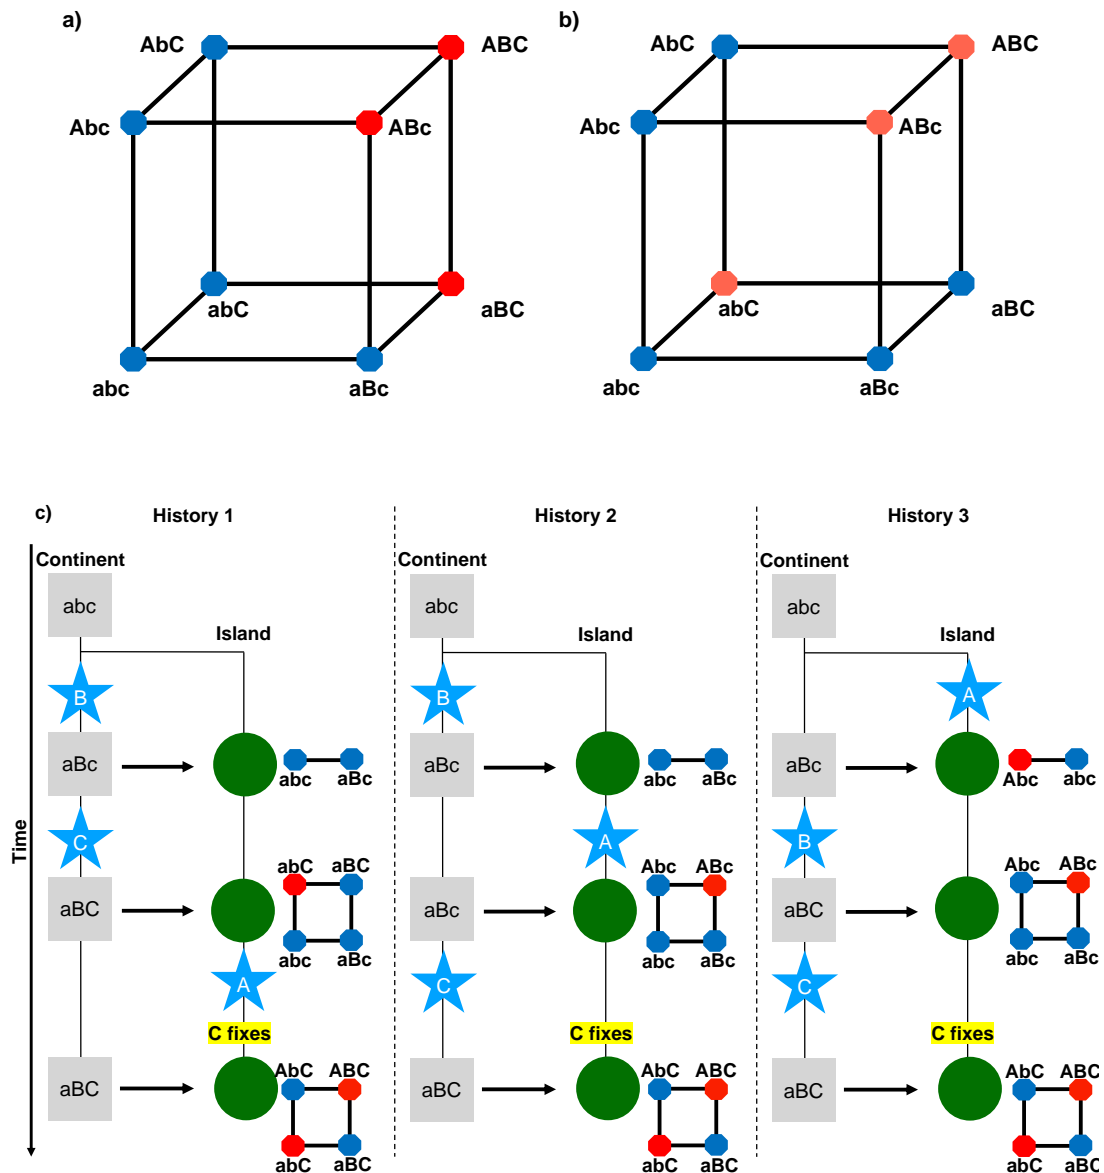

Figure 2: **With 3 loci and cryptic epistasis, the high-fitness ridge of a parapatric 2-locus DMI can be turned into a deep fitness valley.** a) Fitness graph for a model with negative pairwise epistasis between *A* and *B*, and *B* and *C*, which does not allow for parapatric evolution of a strong genetic barrier. Red dots correspond to low fitness haplotypes and blue dots to high fitness haplotypes. b) Fitness graph for a model with negative epistasis between *A* and *B* and a strongly deleterious allele *C*. Both alleles *A* and *B* can compensate for the deleterious effect of *C* but the compensation is not cumulative. This fitness landscape can allow for the parapatric evolution of a strong genetic barrier, because it contains a 2-locus fitness graph with two fitness peaks isolated from each other by a deep valley, if allele *C* is fixed. c) Three possible evolutionary histories and the temporary underlying fitness graphs (subgraphs of b)) can lead to the formation of a fitness landscape in which the two fitness peaks (*AbC* and *aBC*) are separated by an unsurpassable fitness valley. This strong genetic barrier can evolve via single-step mutations in the presence of gene flow, due to the existence of a high fitness ridge that disappears through fixation of allele *C*.

298 This equation has a simple form because the  $abC$  haplotype is deleterious and therefore no  
 299 longer a potential step for evolution. Equation (3) can be reduced to  $\Lambda_{\max}^{Ab|C} = \max(\alpha, \alpha - \beta) =$   
 300  $\Lambda_{\max}^{Ab|c}$  when  $C$  is advantageous ( $\gamma' > 0$ ) on the island (eq. (S19)). The maximum amount of  
 301 local adaptation, which characterizes the ecological differentiation in the model, is unaffected  
 302 by the new mutation;  $C$  modifies the genetic background of both populations but is not directly  
 303 involved in the divergence process. Since we assume that the new mutation  $C$  fixes, its position  
 304 in the genome is irrelevant for the polymorphic equilibrium state. (For conditions of fixation of  
 305 allele  $C$  on the island see section S 3.3).

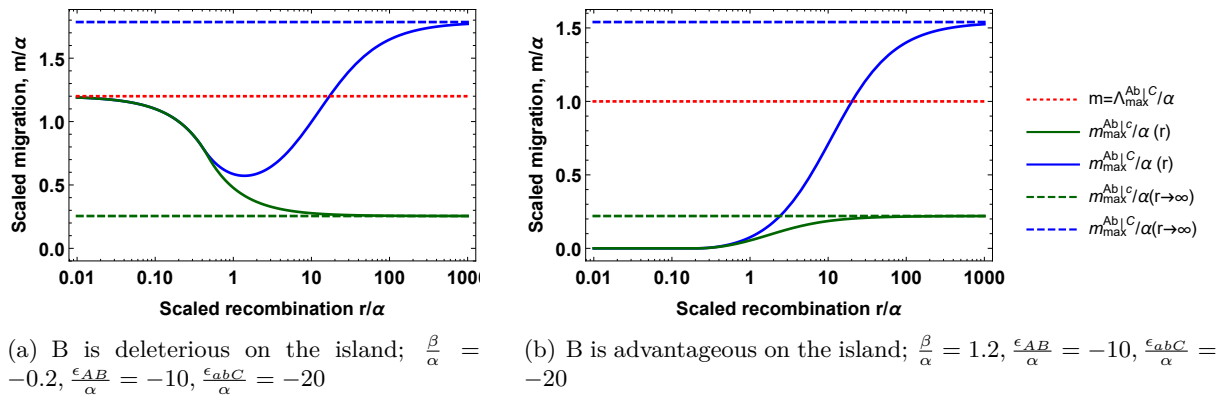

Figure 3: **Strong genetic barriers form through global fixation of allele  $C$  if there is sufficient recombination.** The relative maximum amount of local adaptation  $\frac{\Lambda_{\max}^{Ab|C}}{\alpha}$  is given by the dotted red line. The graph shows the relative strength of the genetic barrier as a function of recombination for the two-locus DMI before the  $C$  mutation appears,  $\frac{m_{\max}^{Ab|c}}{\alpha}$  in green, and after  $C$  has fixed on the island  $\frac{m_{\max}^{Ab|C}}{\alpha}$  in blue. Their corresponding limits for loose linkage are represented by the dashed lines, in green for  $\frac{m_{\max}^{Ab|c}}{\alpha}$  and in blue for  $\frac{m_{\max}^{Ab|C}}{\alpha}$ . The limits for tight linkage are for panel a)  $\frac{m_{\max}^{Ab|c}}{\alpha} = \frac{m_{\max}^{Ab|C}}{\alpha} = \frac{\Lambda_{\max}^{Ab|C}}{\alpha}$  (red dotted line) and for panel b)  $\frac{m_{\max}^{Ab|c}}{\alpha} = \frac{m_{\max}^{Ab|C}}{\alpha} = 0$ . All parameters are scaled by the direct selective advantage of allele  $A$ .

306 We investigated the impact of this change of the genetic background for two cases analytically: loci  $A$  and  $B$  are in tight linkage or in loose linkage. Our analysis was complemented  
 307 with simulations for intermediate recombination rates (Fig 3). With tight linkage, the barrier  
 308 remains unchanged in comparison to the original background (at equilibrium, haplotype  $abC$   
 309 does not occur anyway). The barrier is therefore again limited by the maximum amount of local  
 310 adaptation available,  $\Lambda_{\max}^{Ab|C}$ . With loose linkage, the genetic barrier can exceed  $\Lambda_{\max}^{Ab|C}$  when

312 selection against hybrids, via the strength of epistasis, is strong enough:

$$m_{\max}^{Ab|C} > \Lambda_{\max}^{Ab|C} \text{ if } \begin{cases} \beta < 0 & \text{and } \epsilon_{abC} < \frac{(-\epsilon_{AB}(3\alpha-4\beta)+\alpha\beta)}{\epsilon_{AB}+4\alpha-3\beta} & \text{and } \epsilon_{AB} < -4\alpha + 3\beta \\ \beta > 0 & \text{and } \epsilon_{abC} < \frac{\alpha(\beta-3\epsilon_{AB})}{4\alpha+\beta+\epsilon_{AB}} & \text{and } \epsilon_{AB} < -(4\alpha + \beta). \end{cases} \quad (4)$$

313 From the previous section, we know that a strong single-locus barrier can never form. How-  
 314 ever, the existence of a single-locus (unstable) equilibrium is a necessary condition for the 2-locus  
 315 genetic barrier to be globally stable (SI, section S 3.1.1). Therefore, if  $m_{\max}^{Ab} > \Lambda_{\max}^{Ab|C}$ , then the  
 316 2-locus genetic barrier can only be locally stable, emphasizing the important role of selection  
 317 against hybrids. When compared to the old barrier ( $m_{\max}^{Ab|c}$ ), the genetic barrier is strengthened  
 318 if  $-\epsilon_{AB} > \alpha$ , i.e, when the incompatibility between  $A$  and  $B$  is stronger than the direct selective  
 319 advantage of  $A$ ; this is therefore a necessary condition for  $m_{\max}^{Ab|C} > \Lambda_{\max}^{Ab|C}$ . We calculated the  
 320 genetic barrier numerically for an arbitrary genetic distance between  $A$  and  $B$  (Fig. 3): as soon  
 321 as recombination is strong enough (as selection against hybrid depends both on the formation of  
 322 those hybrid and their fitness deficit), we recovered the results from loose linkage, independently  
 323 of the selective advantage of allele  $B$  on the island. Finally, we also investigated, in the case of  
 324 loose linkage, the possibility of locus  $C$  becoming polymorphic instead of being always fixed for  
 325 allele  $C$  and showed that strong barriers can also form in these conditions (Fig. S10).

326 Our assumptions of loose linkage and the continuous-time approximation both implicitly  
 327 rely on weak selection. We therefore derived the equivalent of  $m_{\max}^{Ab|C}$  in the discrete-time model  
 328 assuming that both  $abC$  and  $ABC$  are inviable haplotypes and that  $A$  and  $B$  are located on  
 329 different chromosomes. The results are qualitatively similar, i.e. for a range of parameters,  
 330 a genetic barrier can be stronger than the maximum amount of local adaptation (eq. (S33),  
 331 Fig. S11). Finally, if we assume that the  $abC$  haplotype is inviable ( $\epsilon_{abC} \rightarrow -\infty$ ), the genetic  
 332 barrier is given by  $m_{\max}^{Ab|C} \rightarrow -\frac{\epsilon_{AB}+\beta}{4}$ . Whereas in the simple 2-locus model before, the barrier  
 333 strength was limited by local adaptation (which is limited), the formula here shows that the  
 334 limit is now set by the strength of the incompatibility by hybrid fitness deficit (which is not  
 335 limited).

336 **Diploid populations** In the diploid model we assume that the direct effects of the muta-  
 337 tions ( $\alpha, \beta, \gamma'$ ) are additive and that epistatic interactions ( $\epsilon_{AB}, \epsilon_{abC}$ ) can either be recessive or  
 338 codominant (see section S 3.2.1). Both the recessive and codominant model simplify to their  
 339 equivalent dynamics presented in [5], with the same substitutions as in the haploid model (eq.

340 (S14)).

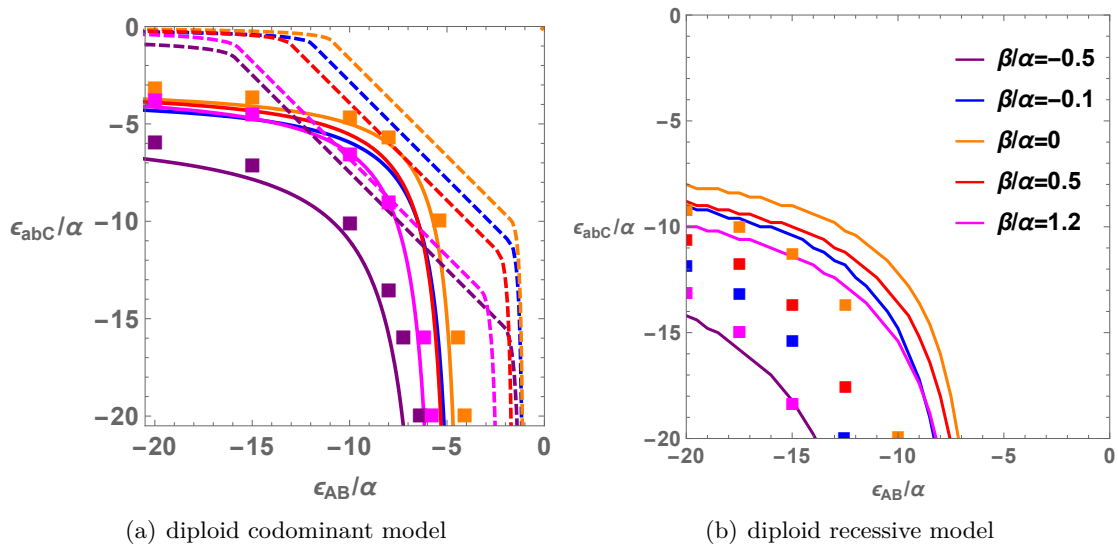

Figure 4: **Parameter region for strong genetic barriers in diploids.** The X axis corresponds to the epistasis between  $A$  and  $B$ ,  $\frac{\epsilon_{AB}}{\alpha}$ . The Y axis corresponds to the epistasis between  $C$  and the ancestral background,  $\frac{\epsilon_{abC}}{\alpha}$ . The area below each curve (strong negative epistasis) indicates the parameter region with a strong genetic barrier,  $m_{\max}^{Ab|C} > \Lambda_{\max}^{Ab|C}$ . Each color corresponds to a different value of  $\frac{\beta}{\alpha}$ , ranging from locally maladapted alleles  $B$  for  $\frac{\beta}{\alpha} = -0.5$  to strongly beneficial alleles  $B$  on the island for  $\frac{\beta}{\alpha} = 1.2$ . The left panel corresponds to the codominant diploid model, with the dashed lines corresponding to tight linkage (eq. (S20)) and the solid lines to loose linkage (eq. (4)). The right panel corresponds to the recessive model. For the recessive model, a strong barrier cannot be form if the loci are in tight linkage (no dashed lines) and the solid lines are obtained from numerical solution of the evolution equations. In both panels, the squares correspond to results for the equivalent discrete-time model that allows for strong selection, assuming that  $A$  and  $B$  are on different chromosomes.

341 We have established above that the maximum amount of local adaptation,  $\Lambda_{\max}$ , is not a  
 342 limit to the strength of a genetic barrier for haploid populations, if epistatic interactions are  
 343 complex and include interactions with the genetic background. Also in diploids, the strength of  
 344 the genetic barrier exceeds the maximum amount of local adaptation when negative epistasis is  
 345 strong enough (area below the line on Fig. 4). More precisely, the maximum amount of local  
 346 adaptation is not a limit to the strength of the genetic barrier as long as the incompatibilities are  
 347 strong and expressed in the F1 generation. They can be expressed either through recombination  
 348 ( $A$  and  $B$  in loose linkage) or through the codominance of the interactions. When  $A$  and  $B$  are  
 349 in tight linkage and epistasis is recessive, the genetic barrier is given by  $m_{\max}^{Ab|C} = \alpha - \beta$  and is  
 350 therefore at best equal to the maximum amount of local adaptation.

351 For the codominant model in loose linkage, we proved that a neutral continental adaptation,  
 352  $\beta = 0$ , is the easiest condition to form a barrier that exceeds  $\Lambda_{\max}^{Ab|C}$ ; by easiest condition we  
 353 mean that it requires the least amount of negative epistasis, as it maximizes equation (4). A



354 neutral  $B$  allele does not contribute to the maximum amount of local adaptation, therefore all  
355 local adaptation can be captured by the  $A$  adaptation ( $\alpha \rightarrow \Lambda_{\max}^{Ab|C}$ ). At the same time, if  $B$   
356 is not advantageous on the island, direct selection is not acting against the maintenance of the  
357 DMI and does not reduce the strength of genetic barrier.

358 For the codominant model, having  $A$  and  $B$  in tight linkage requires less epistasis to form  
359 a genetic barrier that exceeds  $\Lambda_{\max}^{Ab|C}$  than in loose linkage. That is because selection against  
360 hybrids is expressed for both linkage architectures, but the migration cost is paid only once if  
361  $A$  and  $B$  are in tight linkage, but twice if in loose linkage. Therefore, it is easier to form a  
362 strong barrier in tight linkage. For the recessive model,  $m_{\max}^{Ab|C} > \Lambda_{\max}^{Ab|C}$  is possible only if there  
363 is recombination between the two loci, otherwise the incompatibilities are never expressed and  
364 selection against hybrids is inactive.

365 The discrete-time model is qualitatively similar to the continuous-time model as illustrated  
366 in Figure 4(a): The different dots correspond to the minimal conditions on the strength of  
367 epistasis to observe a genetic barrier stronger than the maximum amount of local adaptation in  
368 the discrete-time codominant model. The fact that both the continuous and discrete time model  
369 are qualitatively similar is crucial, since the formation strong barriers require strong epistatic  
370 interactions, for which the equivalence between continuous and discrete-time model is no longer  
371 ensured.

## Discussion

373 We here show that interactions between three loci can be sufficient to confer strong repro-  
374 ductive isolation between two populations in parapatry, and the evolution of this barrier is  
375 possible in the presence of ongoing gene flow. We first establish that in the absence of epistasis  
376 or under a large number of “simple” epistasis schemes (as described above), the amount of local  
377 adaptation between well-adapted types in both populations is a hard limit for the strength of a  
378 genetic barrier. We then describe a simple 3-locus scenario in which a much stronger barrier can  
379 evolve. Crucially, the scenario relies on cryptic epistasis, i.e., epistasis between the divergent  
380 alleles and a derived background allele that fixes in both populations. In this case, a strong  
381 barrier is possible if a classical 2-locus DMI is stabilized by positive epistasis of both interacting  
382 partners with such a background allele. Since the strength of the genetic barrier relies on strong  
383 selection against hybrids, this phenomenon requires sufficiently strong recombination between  
384 the interacting loci to be observable in haploid populations. In diploids, where hybrid geno-

385 types also form without recombination, codominance of the incompatibilities and tight linkage  
386 between the loci involved in the initial DMI provide the best conditions for the evolution of  
387 strong reproductive isolation.

388 **Postzygotic reproductive isolation and ecological speciation** The accumulation of ge-  
389 netic incompatibilities due to selection or drift is a standard mechanism to explain the evolution  
390 of reproductive isolation between two allopatric populations [2]. In the presence of gene flow,  
391 however, each new incompatible mutation faces a fitness deficit. Theoretically, a contribution  
392 to local adaptation by each of these mutations can make up for this deficit. Indeed, it has been  
393 shown that the accumulation of locally adaptive mutations between two parapatric populations  
394 can result in genetic barriers to gene flow of arbitrary strength [11, 9]. Realistically, however,  
395 the maximum amount of local adaptation that is available (as a function of the differences  
396 in the external environment) between two populations will often be limited: while migrants  
397 from nearby habitats often have a fitness deficit relative to locals, they are usually not entirely  
398 lethal or infertile. Imposing such an upper bound immediately renders an upper bound for the  
399 strength of a genetic barrier. In the presence of epistasis and genetic incompatibilities, fitness  
400 deficits of hybrids may be much larger than the ones of migrants, opening up the potential for  
401 a stronger barrier. Nevertheless, our results show that for most models with simple epistasis,  
402 local adaptation is still a limit for the amount of gene flow that a barrier, built in parapatry,  
403 can sustain:  $m_{\max} \leq \Lambda_{\max}$ . This limit holds 1) for all 1 and 2-locus models, 2) for all models  
404 in which all loci are tightly linked, 3) for models with only island adaptations or deleterious  
405 continental mutations, and 4) for models with only negative epistasis between continental and  
406 island mutations.

407 **Cryptic epistasis enables the formation of a genetic barrier stronger than the max-**  
408 **imum amount of local adaptation** Conceptually, speciation in the presence of gene flow  
409 requires a fitness landscape in which (at least) two peaks are connected via a high-fitness ridge  
410 of single-step mutations. Yet, to exceed the limit imposed by the maximum amount of local  
411 adaptation, any recombinants between the peak genotypes have to be strongly deleterious. This  
412 can be achieved by what we term “cryptic” epistasis, i.e, when the interaction with (at least) a  
413 third derived allele turns the high-fitness ridge that allowed for the evolution of an initial DMI  
414 into a fitness valley. Importantly, this third allele must fix in the population, or otherwise the  
415 high-fitness ridge is not yet fully interrupted.

416 In a minimal model, three loci are necessary to form the required underlying fitness land-  
417 scape. In this landscape, the first mutational step corresponds to the establishment of initial  
418 differentiation between the two populations, which requires some local adaptation (either on the  
419 continent or on the island) at the respective locus. The second mutation generates a derived-  
420 derived incompatibility with the first adaptation (for the equivalence with other types, see [5]).  
421 At this point, two fitness peaks correspond to the two derived haplotypes, one of which is fixed  
422 on the continent, whereas the other dominates the island. These peaks are still connected via  
423 a high-fitness recombinant, namely the ancestral haplotype, which is always segregating due to  
424 migration and recombination of the two derived haplotypes. Finally, a third mutation occurs on  
425 the continent; this adaptation is deleterious in the background of the ancestral haplotype, but  
426 advantageous in the presence of both previous mutations. If this third mutation fixes on both  
427 the continent and the island, recombinants between the dominant haplotypes on the continent  
428 and the island (each of which inhabit a fitness peak) are always deleterious. As a consequence,  
429 the resident island genotype can now withstand much stronger gene flow than suggested by the  
430 fitness differences between the two derived haplotypes.

431 For a hypothetical example of cryptic epistasis, assume that mutations at loci  $A$  and  $B$   
432 correspond to adaptations leading to specialization for the prevalent food source on island and  
433 continent, respectively. Both come with a (large) cost of catching/exploiting the other one, such  
434 that  $AB$  individuals are not good catching/exploiting either. Mutation  $C$  makes individuals stick  
435 to a single foraging pattern, which is bad for the  $ab$  generalists, but good for both specialists,  
436 and may thus fix in both populations.

437 DMIs have been investigated mainly with respect to negative pairwise epistasis [17, 18, 5,  
438 19, 13]. Here, we showed that more complex epistasis can significantly alter the potential for the  
439 evolution of reproductive isolation in parapatry. A key player in our minimal model of strong  
440 reproductive isolation is an allele that becomes fixed across both diverging populations during the  
441 course of the speciation process. The possibility that globally fixed mutations are involved in the  
442 speciation process complicates the challenge of inferring speciation genes and reconstructing the  
443 evolutionary trajectory of the incipient species. Specifically, these fixed mutations, responsible  
444 for what we term cryptic epistasis, will only be detected as divergent with a sister-clade and they  
445 will not appear in F1 and F2 hybrid viability analysis [20, 21], thus their role in the speciation  
446 process may easily be overlooked.

447 The importance of complex (non-negative pairwise) epistatic interactions in speciation has  
448 been stressed in several studies. Fraisse *et al.* [22] compiled a list of studies with DMIs of higher

449 order than pairwise interactions and using the framework of Fisher’s geometric model, showed  
450 that complex DMIs are likely to play an important role in the speciation process. In a model of  
451 secondary contact [23], divergent gene clusters with complex incompatibilities, but without any  
452 local adaptation (neutral gene networks), can be maintained in the face of secondary gene flow.  
453 The less connected the neural network is, the easier it is to maintain the divergence. Since all  
454 steps on the network are neutral, however, divergence can never evolve in the presence of gene  
455 flow and an allopatric phase is always necessary.

456 **Scope and limits of our model** The results presented here were derived using an analytical  
457 framework, complemented with some numerical calculations. To do so, we used a continuous  
458 time approximation, which has the disadvantage of having parameters that are meaningful only  
459 in relationship with each other. We confirmed that we observe a qualitatively similar pattern  
460 in a discrete time scenario, where parameters can be transposed to natural cases. Furthermore,  
461 we investigate this question under an infinite population size model. Adding genetic drift to the  
462 model is of great interest as temporal dynamics, as well as drift, may impact the final outcome.  
463 Adding drift may probably weaken the genetic barrier since the island population will be smaller.  
464 However, it may favor the introgression of background mutations from the continent to the island  
465 and therefore accelerate the formation of strong genetic barriers. Similarly, we focus mainly on  
466 cases of linkage equilibrium. Feder et al. [24] showed that strong linkage disequilibrium between  
467 many loci may trigger a genome-wide reduction in gene flow, “genome congealing” (sensu Turner  
468 [25, 26, 27]). It will be interesting to see how these two mechanisms may combine during the  
469 speciation process. Finally, we only observed the evolution of these strong genetic barriers when  
470 the  $C$  mutation fixed on the island, but could not exclude the possibility that strong barriers  
471 can evolve even if the  $C$  allele remains polymorphic on the island.

472 In our minimal model, a lot of deleterious hybrids will be generated which comes at a cost  
473 for the island population. Co-existence of the “island species” and the “continental species” in  
474 this case thus relies on a sufficiently large population size on the island, such that the “island  
475 types” are always in the majority relative to the continental migrants (Fig. S8). In this case,  
476 the continental migrants suffer more from matings with the island types (since continental  
477 types will mainly produce inviable hybrid offspring). The dynamics may change if subsequent  
478 evolution of prezygotic isolation strengthens the genetic barrier without requiring any further  
479 local adaptation. Indeed, our model should provide a favorable scenario for such reinforcement  
480 [28, 29, 30]. However, even if all types avoid matings with the opposite type, the continental

481 type may eventually still swamp the island due to migration pressure. This would depend on  
482 the details of the assortment mechanism and may be precluded if mate choice comes at a cost.

483 **A route to parapatric speciation?** Hybrid incompatibilities have been proposed as an en-  
484 gine of speciation in allopatry, where simple accumulation of individually neutral but negatively  
485 interacting mutations “almost necessarily” leads to a “snowball effect” and eventual reproduc-  
486 tive isolation [17], a process which is impeded in the presence of any amount of gene flow [5].  
487 In a similar vein, the accumulation of locally adapted alleles was proposed as a natural engine  
488 of speciation in parapatry [11]. By studying the interaction of local adaptation and hybrid  
489 incompatibilities in the presence of gene flow, our previous [5][9] and current work challenges  
490 the view of parapatric speciation as a gradual and monotonous process that is mainly driven by  
491 local adaptation.

492 We have previously shown that some local adaptation is indeed a necessary ingredient for  
493 the evolution of a genetic barrier in the presence of gene flow [5], and that this barrier can either  
494 grow or shrink as additional mutations appear [9]. Here, we show that in a large class of models  
495 with simple fitness landscapes, the ecological differentiation is an upper bound for the strength  
496 of a genetic barrier that can evolve in the presence of gene flow. Thus, if local adaptation is  
497 limited (which it realistically is), also the potential for the evolution of reproductive isolation in  
498 parapatry is usually limited.

499 Importantly, we also discovered specific fitness landscapes that combine locally adapted  
500 alleles with specific epistatic interactions, which enable the evolution of much stronger genetic  
501 barriers and even complete isolation in the presence of gene flow. Whether strong reproductive  
502 isolation between parapatric populations might indeed evolve through the combination of local  
503 adaptation and epistasis described here is thus dependent on the existence of the necessary fitness  
504 landscapes in nature. If they exist, the route to strong reproductive isolation could require only  
505 a small number of mutational steps. If such fitness landscapes do not exist, strong postzygotic  
506 reproductive isolation in the presence of gene flow may never be reached even after a very long  
507 time. An important conclusion from our work is thus a strong dependence of the feasibility of  
508 parapatric speciation on the underlying genetics, which makes it difficult to infer and predict.

509 **Acknowledgments:** We thank R. Bürger, M. Servedio, C. Vogl, S. Mousset, I. Fragata, I.  
510 Höllinger and the Biomathematics Group at the University of Vienna for helpful discussion and  
511 comments on the manuscript, and the editor and the two anonymous reviewers for their valuable  
512 suggestions that have improved this manuscript. A.B. was supported by the Marie Curie Initial

513 Training Network INTERCROSSING. C.B. is grateful for support by EMBO Installation Grant  
514 IG4152. A.B. and C.B. were supported by ERC Starting Grant 804569 - FIT2GO.

## References

- 516 [1] Darwin C. The origin of species. London: Murray; 1859.
- 517 [2] Coyne J, Orr H. Speciation. Sinauer Associates Sunderland, MA; 2004.
- 518 [3] Butlin R, Debelle A, Kerth C, Snook R, Beukeboom L, et al. What do we need to know  
519 about speciation? *Trends in Ecology & Evolution*. 2012;27(1):27–39.
- 520 [4] Seehausen O, Butlin R, Keller I, Wagner C, Boughman J, et al. Genomics and the origin  
521 of species. *Nat Rev Genet*. 2014;15(3):176–192.
- 522 [5] Bank C, Bürger R, Hermisson J. The Limits to Parapatric Speciation: Dobzhansky–Muller  
523 Incompatibilities in a Continent–Island Model. *Genetics*. 2012;191(3):845–863.
- 524 [6] Kulmuni J, Westram AM. Intrinsic incompatibilities evolving as a by-product of divergent  
525 ecological selection: Considering them in empirical studies on divergence with gene flow.  
526 *Molecular Ecology*. 2017;26(12):3093–3103.
- 527 [7] Yang M, He Z, Shi S, Wu C. Can genomic data alone tell us whether speciation happened  
528 with gene flow? *Molecular Ecology*. 2017;26(11):2845–2849.
- 529 [8] Höllinger I, Hermisson J. Bounds to parapatric speciation: A Dobzhansky–Muller in-  
530 compatibility model involving autosomes, X chromosomes, and mitochondria. *Evolution*.  
531 2017;71(5):1366–1380.
- 532 [9] Blanckaert A, Hermisson J. The limits to parapatric speciation II: Strengthening a preex-  
533 isting genetic barrier to gene flow in parapatry. *Genetics*. 2018;209(1):241–254.
- 534 [10] Via S. Natural selection in action during speciation. *Proceedings of the National Academy  
535 of Sciences*. 2009;106(Supplement 1):9939–9946.
- 536 [11] Flaxman S, Feder J, Nosil P. Genetic hitchhiking and the dynamic buildup of genomic  
537 divergence during speciation with gene flow. *Evolution*. 2013;67(9):2577–2591.
- 538 [12] Via S, West J. The genetic mosaic suggests a new role for hitchhiking in ecological specia-  
539 tion. *Molecular Ecology*. 2008;17(19):4334–4345.

- 540 [13] Blanckaert A, Bank C. In search of the Goldilocks zone for hybrid speciation. PLOS  
541 Genetics. 2018 09;14(9):1–23.
- 542 [14] Barton N, Bengtsson B. The barrier to genetic exchange between hybridising populations.  
543 Heredity. 1986;57(3):357–376.
- 544 [15] Kawecki TJ, Ebert D. Conceptual issues in local adaptation. Ecology letters.  
545 2004;7(12):1225–1241.
- 546 [16] Nagylaki T, Lou Y. Patterns of multiallelic polymorphism maintained by migration and  
547 selection. Theoretical Population Biology. 2001;59(4):297–313.
- 548 [17] Orr H. The population genetics of speciation: the evolution of hybrid incompatibilities.  
549 Genetics. 1995;139(4):1805–1813.
- 550 [18] Turelli M, Orr H. Dominance, epistasis and the genetics of postzygotic isolation. Genetics.  
551 2000;154(4):1663–79.
- 552 [19] Schumer M, Cui R, Rosenthal G, Andolfatto P. Reproductive isolation of hybrid populations  
553 driven by genetic incompatibilities. PLoS Genet. 2015;11(3):e1005041.
- 554 [20] Presgraves D. A fine-scale genetic analysis of hybrid incompatibilities in *Drosophila*. Ge-  
555 netics. 2003;163(3):955–972.
- 556 [21] Corbett-Detig R, Zhou J, Clark A, Hartl D, Ayroles J. Genetic incompatibilities are  
557 widespread within species. Nature. 2013;504(7478):135–137.
- 558 [22] Fraïsse C, Elderfield J, Welch J. The genetics of speciation: are complex incompatibilities  
559 easier to evolve? Journal of evolutionary biology. 2014;27(4):688–699.
- 560 [23] Paixão T, Bassler K, Azevedo R. Emergent speciation by multiple Dobzhansky-Muller  
561 incompatibilities. bioRxiv. 2014;p. 008268.
- 562 [24] Feder J, Nosil P, Wacholder A, Egan S, Berlocher S, Flaxman S. Genome-wide congealing  
563 and rapid transitions across the speciation continuum during speciation with gene flow.  
564 Journal of Heredity. 2014;105(S1):810–820.
- 565 [25] Turner J. Why does the genotype not congeal? Evolution. 1967;21(4):645–656.
- 566 [26] Barton N. Multilocus Clines. Evolution. 1983;37(3):454.

- 567 [27] Kruuk L, Baird S, Gale K, Barton N. A comparison of multilocus clines maintained by  
568 environmental adaptation or by selection against hybrids. *Genetics*. 1999;153(4):1959–1971.
- 569 [28] Servedio M, Noor M. The role of reinforcement in speciation: Theory and data. *Annual*  
570 *Review of Ecology, Evolution, and Systematics*. 2003;34(Noor 1999):339–364.
- 571 [29] Servedio MR, Bürger R. The effects of sexual selection on trait divergence in a peripheral  
572 population with gene flow. *Evolution*. 2015;69(10):2648–2661.
- 573 [30] Rosser N, Queste LM, Cama B, Edelman NB, Mann F, Mori Pezo R, et al. Geographic con-  
574 trasts between pre-and postzygotic barriers are consistent with reinforcement in *Heliconius*  
575 butterflies. *Evolution*. 2019;73(9):1821–1838.
